# Supplementary material for: Isolation and Characterization of the Wastewater Micropollutant Phenacetin-Degrading Bacterium Rhodococcus sp. Strain PNT-23
Source: MDPI journal article supplement (doi:10.3390/microorganisms11081962), 2023-07-31
Supplement: s1 [file s1]

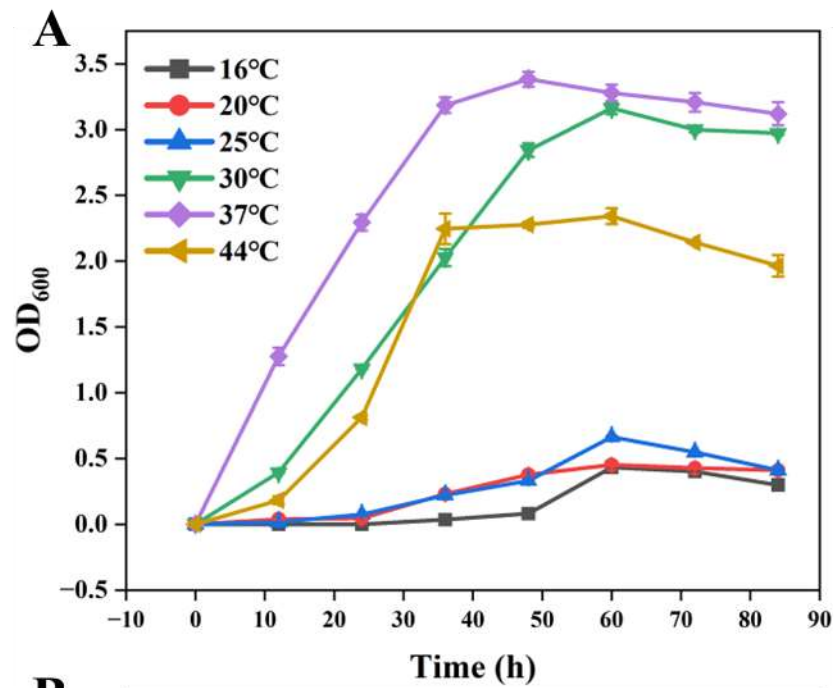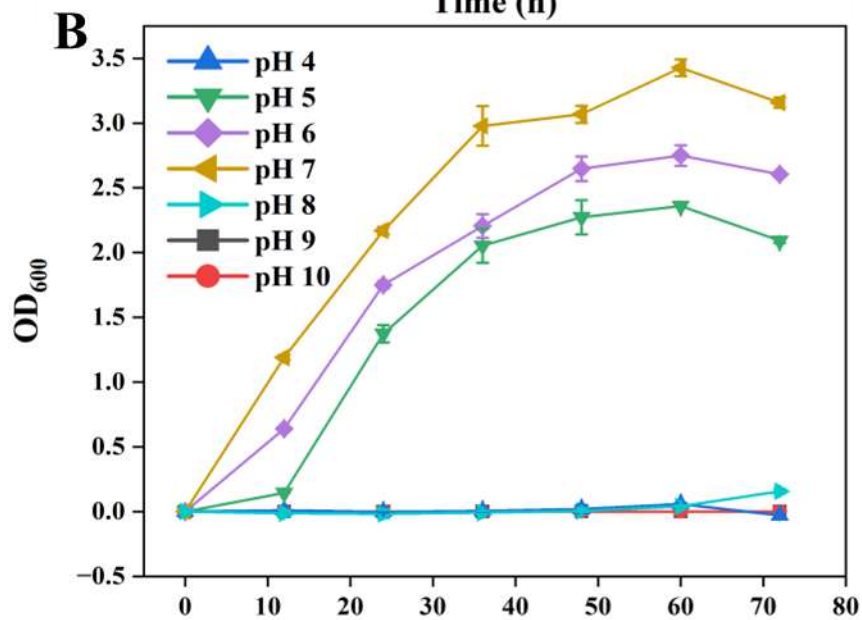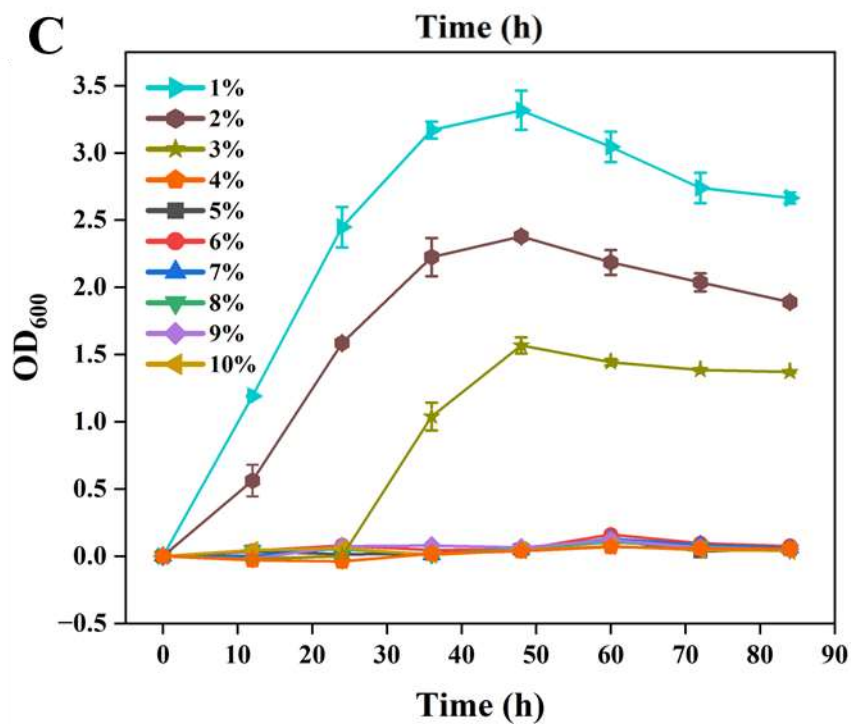

Fig. S1: The effect of temperature, pH value and NaCl concentration on the cell growth status of strain PNT-23 in LB medium, (A) the effect of temperature on the cell growth status of strain PNT-23 in LB medium at 16°C, 20°C, 25°C, 30°C, 37°C and 44°C, (B) the effect of pH value on the cell growth status of strain PNT-23 in LB medium at pH values of 5.0, 6.0, 7.0, 8.0, 9.0 and 10.0, and (C) the effect of NaCl concentration on the cell growth status of strain PNT-23 in LB medium at NaCl concentrations ranging from 1% to 10% (w/v).
